# Supplementary material
Source: PubMed Central journal article supplement (PMC6924008)

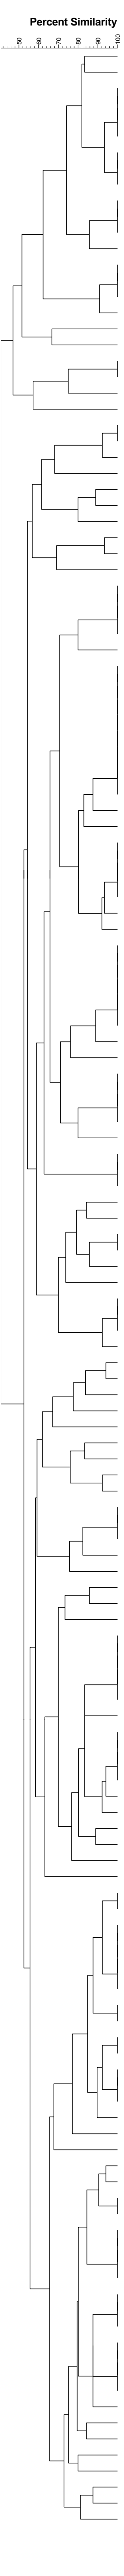

| Ribotype | REA Group | REA Type |
|----------|-----------|----------|
| 045      | BK        | BK15     |
| 045-like | BK        | BK3      |
| 126      | BK        | BK16     |
| 126      | BK        | BK6      |
| 126      | BK        | BK6      |
| 126      | BK        | BK6      |
| 078      | BK        | BK10     |
| 078      | BK        | BK 1     |
| 078      | BK        | BK13     |
| 066-like | CF        | CF19     |
| 066-like | BK        | BK3      |
| 066-like | CF        | CF19     |
| 066      | BK        | BK17     |
| 033      | AA        | AA1      |
| 033      | AA        | AA2      |
| 033      | AA        | AA1      |
| 288      | AA        | AA3      |
| 063      | BH        | BH3      |
| 122      | DM        | DM       |
| 070      | L         | L*       |
| 070      | L         | L5       |
| 057      | L         | L*       |
| 060      | P         | P*       |
| 251      | AH        | AH1      |
| 251      | AH        | AH6      |
| 153      | DG        | DG1      |
| 050      | N         | N*       |
| 003      | AB        | AB*      |
| 003-like | L         | L3       |
| 019      | AH        | AH7      |
| 085      | AZ        | AZ*      |
| 088      | AZ        | AZ*      |
| 083      | DO        | DO1      |
| 054      | A         | A1       |
| 054      | A         | A5       |
| 054      | A         | A1       |
| 054      | A         | A7       |
| 081      | D         | D5       |
| 053      | K         | K16      |
| 053      | B         | B1       |
| 053      | B         | B3       |
| 053      | B         | B1       |
| 053      | K         | K3       |
| 053      | K         | K1       |
| 053      | K         | K14      |
| 053      | B         | B2       |
| 053      | K         | K3       |
| 031      | AE        | AE*      |
| 163      | CO        | CO3      |
| 027      | BI        | BI23     |
| 027      | BI        | BI1^     |
| 027      | BI        | BI29     |
| 027      | BI        | BI3^     |
| 027      | BI        | BI17     |
| 016      | BI        | BI8      |
| 036      | BI        | BI21     |
| 005      | E         | E12      |
| 005      | E         | E1       |
| 005      | Y         | Y20      |
| 005      | E         | E7       |
| 005      | E         | E5       |
| 005      | E         | E9       |
| 042      | E         | E11      |
| 009      | T         | T*       |
| 012      | R         | R24      |
| 012      | R         | R1       |
| 012      | R         | R23      |
| 012      | R         | R25      |
| 117      | R         | R30      |
| 075      | X         | X1       |
| 075      | X         | X1       |
| 075      | X         | X3       |
| 039      | AQ        | AQ6      |
| 067      | AQ        | AQ4      |
| 265      | CG        | CG 1     |
| 265      | CG        | CG3      |
| 040      | DP        | DP1      |
| 004      | CL        | CL2      |
| 017      | CF        | CF1      |
| 017      | CF        | CF2      |
| 017      | CF        | CF7      |
| 047      | CF        | CF16     |
| 056      | A         | A4       |
| 056-like | AL        | AL4      |
| 190      | AL        | AL 1     |
| 035      | AD        | AD5      |
| 022      | AJ        | AJ*      |
| 026      | CW        | CW2      |
| 029      | DI        | DI1      |
| 023      | AN        | AN*      |
| 058      | AN        | AN5      |
| 103      | BM        | BM 1     |
| 103      | BM        | BM5      |
| 103      | BM        | BM9      |
| 051      | CQ        | CQ3      |
| 084      | AP        | AP*      |
| 010      | M         | M11      |
| 131      | DL        | DL1      |
| 079      | DK        | DK1      |
| 002      | G         | G13      |
| 002      | G         | G1       |
| 002      | G         | G9       |
| 002      | J         | J17      |
| 002      | G         | G11      |
| 147      | DH        | DH10     |
| 106      | DH        | DH10     |
| 106      | DH        | DH17     |
| 106      | DH        | DH4      |
| 106      | DH        | DH7      |
| 174      | DH        | DH2      |
| 118      | DH        | DH2      |
| 011      | AJ        | AJ*      |
| 018      | W         | W10      |
| 037      | DN        | DN1      |
| 068      | CR        | CR*      |
| 115      | J         | J32      |
| 115      | J         | J35      |
| 072      | J         | J25      |
| 072      | J         | J2       |
| 072      | J         | J7       |
| 072      | J         | J9       |
| 072      | J         | J9       |
| 062      | N         | N2       |
| 062      | N         | N5       |
| 015      | N         | N7       |
| 015      | N         | N1p      |
| 001      | J         | J33      |
| 001      | J         | J27      |
| 001      | Y         | Y35      |
| 055      | J         | J33      |
| 046      | F         | F11      |
| 064      | CX        | CX1      |
| 007      | Y         | Y4       |
| 014      | Y         | Y33      |
| 014      | Y         | Y31      |
| 014      | Y         | Y4       |
| 014-like | Y         | Y12      |
| 014-like | Y         | Y4       |
| 014-like | Y         | Y4       |
| 014-like | Y         | Y4       |
| 076      | Y         | Y9       |
| 076      | Y         | Y1       |
| 076      | Y         | Y1p      |
| 020      | Y         | Y38      |
| 020      | Y         | Y1p      |
| 020      | Y         | Y1p      |
| 020      | Y         | Y1p      |
| 169      | Y         | Y5       |
| 077      | Y         | Y4       |
| 095      | Y         | Y1       |
| 087      | Z         | Z4       |
| 076-like | Y         | Y8       |
| 006      | Y         | Y33      |
| 025      | Y         | Y5       |
| 043      | BX        | BX*      |

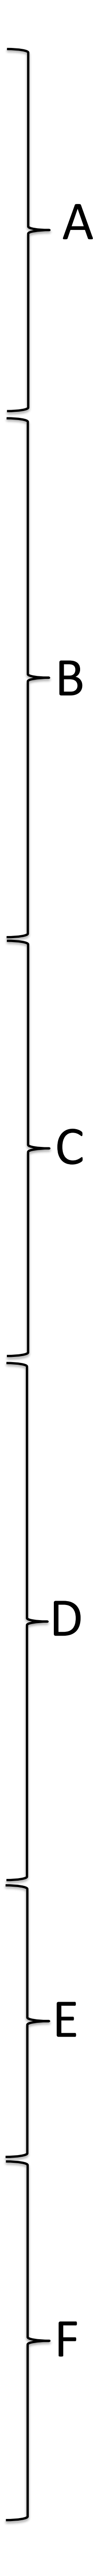

Supplement: NIHMS1032456-supplement-Fig_S1.pdf [file NIHMS1032456-supplement-Fig_S1.pdf]
